# Supplementary material
Source: PubMed Central journal article supplement (PMC3652228)
Supplement: NIHMS451374-supplement-eFigures_online_only.pdf [file NIHMS451374-supplement-eFigures_online_only.pdf]

## Supplementary Online Content

Rosas HD, Chen YI, Doros G, et al. Alterations in brain transition metals in Huntington disease: an evolving and intricate story. *Arch Neurol*. Published Online: March 5, 2012. doi:10.1001/archneurol.2011.2945.

**eFigure 1.** Prediction model of FM increases due to HD. FM increases in presymptomatic and symptomatic HD increase more than might be expected due to age. Green line indicates mean FM values in controls; gray line, 95% upper bound of age-related prediction values.

**eFigure 2.** Iron concentrations were significantly higher in grade 1 postmortem brain, suggesting an early and important role of iron dyshomeostasis in HD.

This supplementary material has been provided by the authors to give readers additional information about their work.

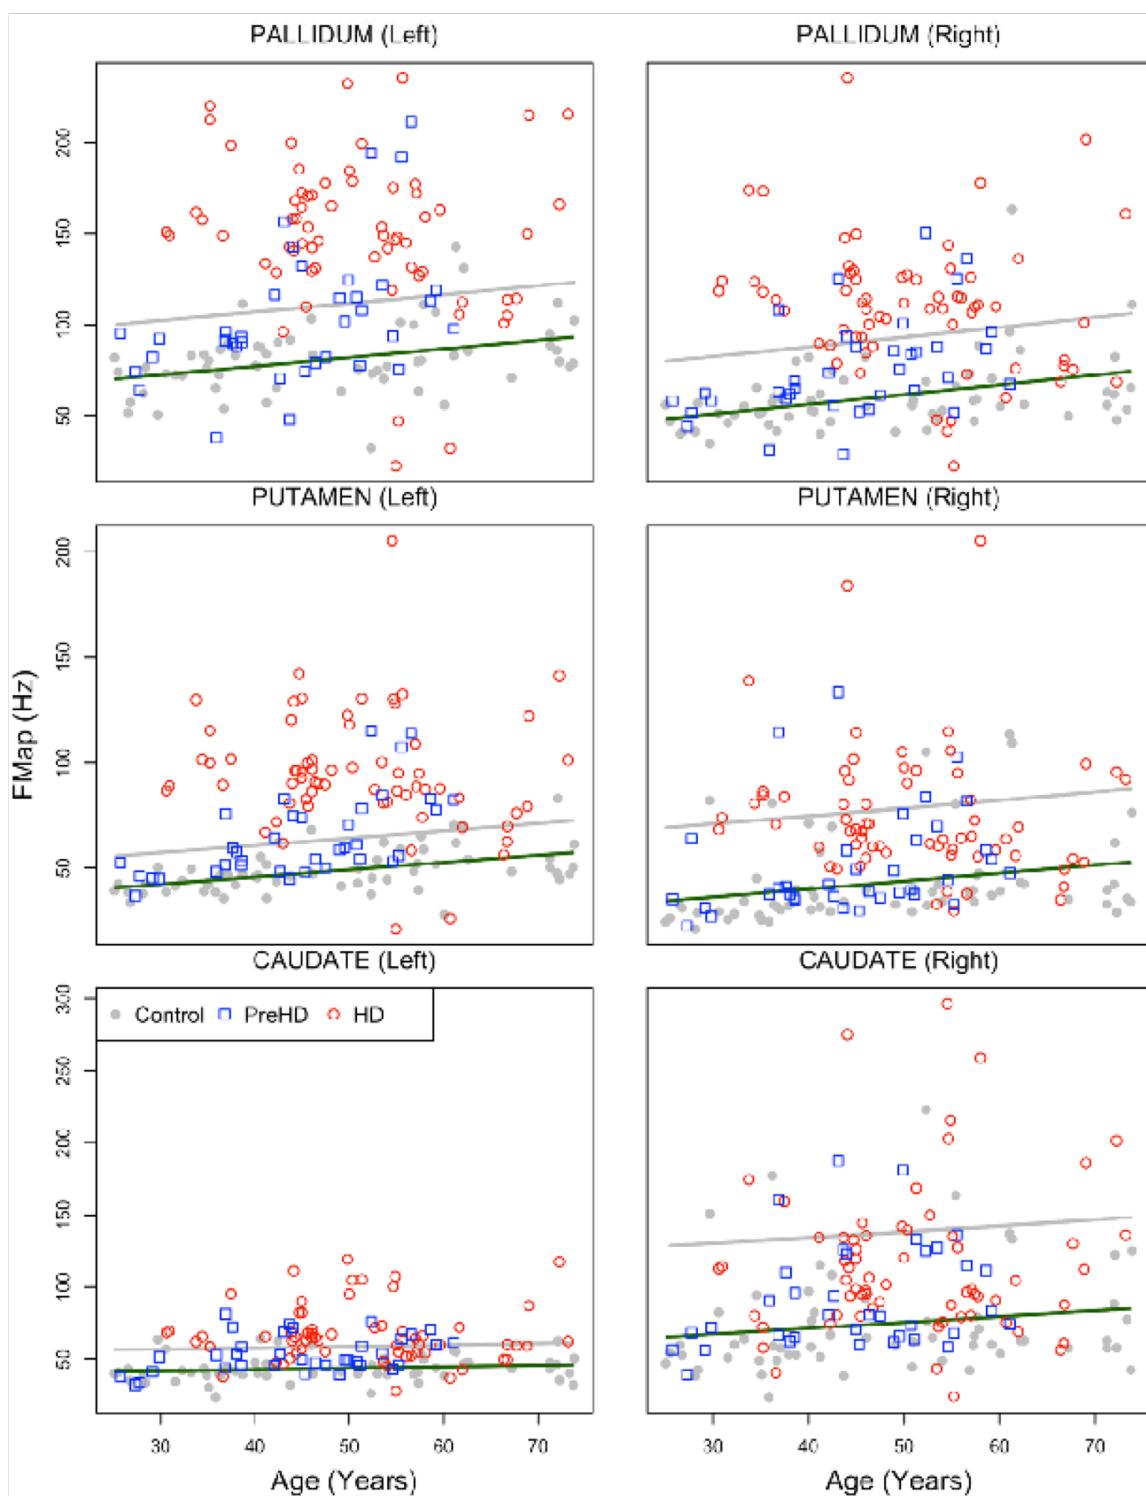

**Figure 1.** Prediction model of FM increases due to HD. FM increases in presymptomatic and symptomatic HD increase more than might be expected due to age. Green line indicates mean FM values in controls; gray line, 95% upper bound of age-related prediction values.

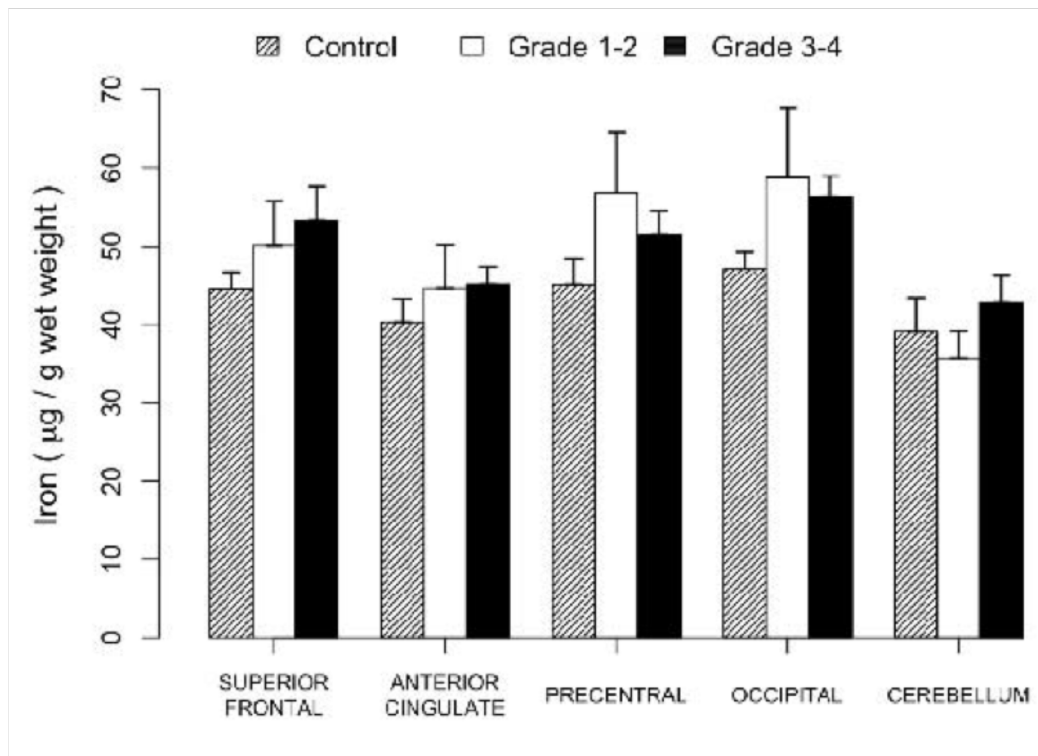

**eFigure 2.** Iron concentrations were significantly higher in grade 1 postmortem brain, suggesting an early and important role of iron dyshomeostasis in HD.
